# Supplementary material
Source: publisher figshare collection journal article supplement (https://gsapubs.figshare.com/ndownloader/files/23295020)
Supplement: Supplementary file 1 [file 23295020]

## Supplementary data: CO<sub>2</sub> sequestration in a UK North Sea analogue for geological carbon storage

**Niklas Heinemann<sup>1\*</sup>, Mark Wilkinson<sup>1</sup>, R. Stuart Haszeldine<sup>1</sup>, Anthony E. Fallick<sup>2</sup>, and Gillian E. Pickup<sup>3</sup>**

<sup>1</sup>*School of GeoSciences, The University of Edinburgh, Edinburgh EH9 3JW, Scotland*

<sup>2</sup>*Scottish Universities Environmental Research Centre, East Kilbride G75 0QF, Scotland*

<sup>3</sup>*Institute of Petroleum Engineering, Heriot-Watt University, Edinburgh, EH14 4AS, Scotland*

\*Current Address: Ikon GeoPressure, Stockton Road, Durham DH1 3LE, UK

### **Background Data used in Calculating Equilibrium Dolomite Line (Figs 2, 3, and 4)**

Current reservoir temperature is estimated to be 80 – 85 °C (Wilkinson et al., 2009)

Isotopic composition of the CO<sub>2</sub> gas in Fizzy: two gas samples gave similar results: δ<sup>13</sup>C CO<sub>2</sub> of 4.3 and 4.6 ‰ V-PDB (Wilkinson, 2009).

Porewater oxygen isotope ratio of the Rotliegend Sandstone in Fizzy is unknown; following Wilkinson et al. (2009) values from the Leman Field are utilised (δ<sup>18</sup>O = 0.3 to 0.4 ‰ V-SMOW; Warren and Smalley, 1992).

### **Oxygen Isotope Fractionation Factor**

Dolomite-water <sup>18/16</sup>O fractionation factor of Deines (1974):

$$1000 \ln \alpha_{dol-water} = 2.73 \cdot (10^6 \cdot T_{(K)}^{-2}) + 0.26 \quad (1)$$

### **Carbon Isotope Fractionation Factor**

No <sup>13/12</sup>C fractionation factor for the dolomite-water system could be found in the literature. The carbon isotope equilibrium fractionation for a dolomite/CO<sub>2</sub> system is calculated via known fractionation factors. Deines (2004) presents an equation that calculates the relationship for the fractionation between Mg-calcite and calcite that can be used to predict the dolomite-calcite fractionation for a Mg-mole fraction of 0.5. He determined the following relationship:

$$1000 \ln a_{Mg\_Cal-Cal} = \left[ \begin{array}{l} 0.013702 - 0.10957 \cdot \frac{10^3}{T_{(K)}} + 1.35940 \cdot \frac{10^6}{T_{(K)}^2} \\ - 0.329124 \cdot \frac{10^9}{T_{(K)}^3} + 0.0304160 \cdot \frac{10^{12}}{T_{(K)}^4} \end{array} \right] \cdot X^{1.5} \quad (2)$$

Where X is the mole fraction of Mg; for dolomite X = 0.5. Combining with the calcite/CO<sub>2</sub> fractionation factor of Deines et al. (1974; Eqn. 3)

$$1000 \ln a_{Cal-CO_2} = 1.194 \cdot (10^6 \cdot T_{(K)}^{-2}) - 3.63 \quad (3)$$

The carbon isotope fractionation can be calculated. Combining:

$$a_{Dol-Cal} = \frac{\delta(dolomite) + 1000}{\delta(calcite) + 1000} \quad (4) \quad \text{and} \quad a_{Cal-CO_2} = \frac{\delta(calcite) + 1000}{\delta(CO_2) + 1000} \quad (5)$$

with

$$\delta(sample) = \delta^{13}C = \left( \frac{\left( \frac{^{13}C}{^{12}C} \right)_{sample}}{\left( \frac{^{13}C}{^{12}C} \right)_{standard}} - 1 \right) \cdot 1000 \text{‰} \quad (6)$$

the dolomite in equilibrium with CO<sub>2</sub> can be calculated from:

$$\delta(dolomite) = [a_{Dol-Cal} \cdot a_{Cal-CO_2} \cdot (\delta(CO_2) + 1000)] - 1000 \quad (7)$$

**Table DR1. Carbon and Oxygen Stable Isotope Data, Selective Extraction Method**

| Sample                 | Time (min) | Yield (%) | $\delta^{13}\text{C}$ ‰ V-PDB | $\delta^{18}\text{O}$ ‰ V-PDB |
|------------------------|------------|-----------|-------------------------------|-------------------------------|
| <b>Fizzy water leg</b> |            |           |                               |                               |
| 1A                     | 45         | 0.9       | -15.5                         | -13.9                         |
| 1B                     | 255        | 2.2       | 24.6                          | -9.4                          |
| 1C                     | 465        | 2.3       | -0.72                         | -8.4                          |
| 1D                     | 1410       | 14.7      | 0.33                          | -7.8                          |
| 1E                     | 1830       | 7.3       | 0.05                          | -6.8                          |
| 1F                     | 2865       | 12.9      | -0.39                         | -6.2                          |
| 1G                     | 3270       | 5.1       | -1.1                          | -5.1                          |
| 1 (final)              | (-)        | 54.2      | -3.8                          | -5.5                          |
| 4A                     | 60         | 0.3       | failed                        |                               |
| 4B                     | 270        | 0.5       | -5.0                          | -15.5                         |
| 4C                     | 510        | 0.6       | -11.0                         | -14.0                         |
| 4D                     | 1510       | 3.1       | -0.99                         | -7.4                          |
| 4E                     | 1910       | 2         | -4.0                          | -10.9                         |
| 4 (final)              | (-)        | 93.5      | -1.9                          | -4.0                          |
| 5uw1                   | 30         |           | failed                        |                               |
| 5uw2                   | 210        |           | -6.2                          | -14.4                         |
| 5uw3                   | 370        |           | -8.9                          | -17.3                         |
| 5uw4                   |            |           | failed                        |                               |
| 5uw5                   | 1315       |           | -2.0                          | -10.8                         |
| 5uw6                   | 1740       |           | -1.1                          | -12.0                         |
| 5 (final)              |            |           | -3.3                          | -4.9                          |
| <b>Fizzy gas leg</b>   |            |           |                               |                               |
| 8A                     | 50         | 0.5       | 39.9                          | -12.9                         |
| 8B                     | 280        | 1.3       | -1.8                          | -9.4                          |
| 8C                     | 465        | 2         | -1.2                          | -9.8                          |
| 8D                     | 1410       | 11        | -0.34                         | -6.6                          |
| 8E                     | 1830       | 6.3       | -0.37                         | -6.2                          |
| 8F                     | 2865       | 11        | -0.11                         | -6.0                          |
| 8G                     | 3270       | 4.9       | -0.62                         | -5.4                          |
| 8 (final)              | (-)        | 63        | -2.8                          | -4.5                          |
| 9A                     | 65         | 1.8       | -15.2                         | -22.1                         |
| 9B                     | 275        | 1.4       | -8.8                          | -21.1                         |
| 9C                     | 515        | 1.8       | -9.7                          | -18.7                         |
| 9D                     | 1515       | 3.2       | -3.5                          | -13.3                         |
| 9E                     | 1915       | 3.2       | -0.25                         | -10.3                         |
| 9 (final)              | (-)        | 88.6      | -8.2                          | -11.3                         |
| 10_1                   | 30         |           | -13.2                         | -12.1                         |
| 10_1                   | 210        |           | failed                        |                               |
| 10_1                   | 410        |           | failed                        |                               |
| 10_1                   | 1420       |           | -1.7                          | -9.1                          |
| 10_1                   | 1875       |           | -3.5                          | -9.7                          |
| 10_1                   | 2905       |           | -1.8                          | -8.9                          |
| 10_1                   | 3320       |           | failed                        |                               |
| 10_1 (final)           | (-)        |           | -6.1                          | -8.9                          |
| 10_2                   | 30         |           | -12.3                         | -19.2                         |

|                                                 |                   |                  |                                                 |                                                 |
|-------------------------------------------------|-------------------|------------------|-------------------------------------------------|-------------------------------------------------|
| 10_2                                            | 210               |                  | -4.0                                            | -11.6                                           |
| <b>Sample</b>                                   | <b>Time (min)</b> | <b>Yield (%)</b> | <b><math>\delta^{13}\text{C}</math> ‰ V-PDB</b> | <b><math>\delta^{18}\text{O}</math> ‰ V-PDB</b> |
| <b>Fizzy gas leg (continued)</b>                |                   |                  |                                                 |                                                 |
| 10_2                                            | 410               |                  | -1.2                                            | -13.1                                           |
| 10_2                                            | 1420              |                  | -0.2                                            | -10.2                                           |
| 10_2                                            | 1865              |                  | -3.0                                            | -11.1                                           |
| 10_2                                            | 2905              |                  | failed                                          |                                                 |
| 10_2                                            | 3305              |                  | -4.2                                            | -11.3                                           |
| 10_2<br>(final)                                 | (-)               |                  | -5.1                                            | -7.1                                            |
| <b>Rotliegend Sandstone below Orwell F ield</b> |                   |                  |                                                 |                                                 |
| 11A                                             | 30                |                  | -9.3                                            | -14.5                                           |
| 11B                                             | 210               |                  | -4.7                                            | -10.6                                           |
| 11C                                             | 370               |                  | -6.2                                            | -12.0                                           |
| 11D                                             | 1315              |                  | -3.3                                            | -8.3                                            |
| 11E                                             | 1735              |                  | -4.5                                            | -8.3                                            |
| 11 (final)                                      | (-)               |                  | -3.0                                            | -4.5                                            |
| 14A                                             | 50                | 0.9              | failed                                          |                                                 |
| 14B                                             | 270               | 1.4              | -8.3                                            | -17.0                                           |
| 14C                                             | 465               | 1.6              |                                                 |                                                 |
| 14D                                             | 1410              | 3                | -5.7                                            | -12.9                                           |
| 14E                                             | 1830              | 1.6              | -7.3                                            | -14.8                                           |
| 14F                                             | 2860              | 2.8              | -6.1                                            | -13.4                                           |
| 14G                                             | 3270              | 2.3              | -5.4                                            | -12.3                                           |
| 14 (final)                                      | (-)               | 86               | -5.9                                            | -8.7                                            |
| 13A                                             | 65                | 1.2              | failed                                          |                                                 |
| 13B                                             | 275               | 1.2              | failed                                          |                                                 |
| 13C                                             | 515               | 2.9              | -20.1                                           | -18.7                                           |
| 13D                                             | 1515              | 3.3              | -8.3                                            | -16.0                                           |
| 13E                                             | 1915              | 3.3              | -7.4                                            | -8.5                                            |
| 13 (final)                                      | (-)               | 88.1             | -6.0                                            | -7.9                                            |
| 16A                                             | 30                |                  | -3.1                                            | -9.1                                            |
| 16B                                             | 210               |                  | -4.0                                            | -13.4                                           |
| 16C                                             | 410               |                  | -3.7                                            | -13.7                                           |
| 16D                                             | 1420              |                  | failed                                          |                                                 |
| 16E                                             | 1870              |                  | -4.4                                            | -11.6                                           |
| 16F                                             | 2900              |                  | failed                                          |                                                 |
| 16G                                             | 3310              |                  | -4.9                                            | -11.7                                           |
| 16 (final)                                      | (-)               |                  | -2.5                                            | -7.3                                            |

**Table DR2. Carbon and Oxygen Stable Isotope Data, Whole Rock Analysis, Rotliegend Sandstone Below Orwell Field**

| Well     | Depth (drillers) / m | Sample number | $\delta^{13}\text{C}$ ‰ V-PDB | $\delta^{18}\text{O}$ ‰ V-PDB |
|----------|----------------------|---------------|-------------------------------|-------------------------------|
| 50/26a-7 | 7656.5               | MW-07-11      | -2.4                          | -4.4                          |
| 50/26a-7 | 7686                 | MW-07-12      | -1.5                          | -4.1                          |
| 50/26a-2 | 7959                 | MW-07-16      | -0.1                          | -4.6                          |
| 50/26a-2 | 7968                 | MW-07-17      | -2.1                          | -7.6                          |
| 50/26a-2 | 7980                 | MW-07-18      | -0.7                          | -4.3                          |
| 50/26a-2 | 8030                 | MW-07-19      | -1.6                          | -6.0                          |
| 50/26a-2 | 8007                 | MW-07-20      | 0.1                           | -5.3                          |

### Comparison of Whole-Rock and Selective Extraction Experiments using Internal Laboratory Dolomite Standard

The standard used for this experiment was purchased as ‘dolomite’ from Ward’s Natural Science Establishment, Inc, Rochester, New York, here referred to as EUDOL. It is ‘pure’ dolomite by X-ray diffraction (XRD) though this does not eliminate the possibility that there are small quantities (< 1 - 2 % ?) of other minerals, especially calcite. ‘Whole-rock’ stable C and O analyses were conducted (Table 3), only 4 were deemed necessary as the results are reasonably reproducible suggesting that the dolomite sample is fairly homogeneous, at least after crushing. The reproducible whole-rock data do not prove that there is no isotopic zonation or other heterogeneity in the standard, merely that any such heterogeneity is homogenised by sample preparation.

Analytical method is as described in the Methods section of the main paper. A temperature of 25 °C was used for all analyses except for the final extractions of samples C20227 and C20228 which were at 100 °C. Dashes (-) in the data tables indicate a failed analysis, usually due to a small gas yield. Times are in minutes after the start of the extraction. Graphs show both whole-rock (‘bulk’) values and selective extractions with arrows showing the order of the extractions, from first to last.

**Table DR3. ‘Whole-Rock’ Analyses of EUDOL Internal Laboratory Dolomite Standard**

| Sample | Yield $\mu\text{mol/mg}$ | $\delta^{13}\text{C}$ ‰ V-PDB | $\delta^{18}\text{O}$ ‰ V-PDB |
|--------|--------------------------|-------------------------------|-------------------------------|
| EUDOL  | 10.8                     | 0.8                           | -14.0                         |
| EUDOL  | 10.8                     | 0.6                           | -14.2                         |
| EUDOL  | 11.2                     | 0.7                           | -14.3                         |
| EUDOL  | 10.9                     | 0.5                           | -14.2                         |

### Test of selective extraction method 1 - Sample C20227

Figure DR1. Comparison of whole-rock and selective extraction of standard sample C20227 (note expanded scales). First extraction has circle around data point.

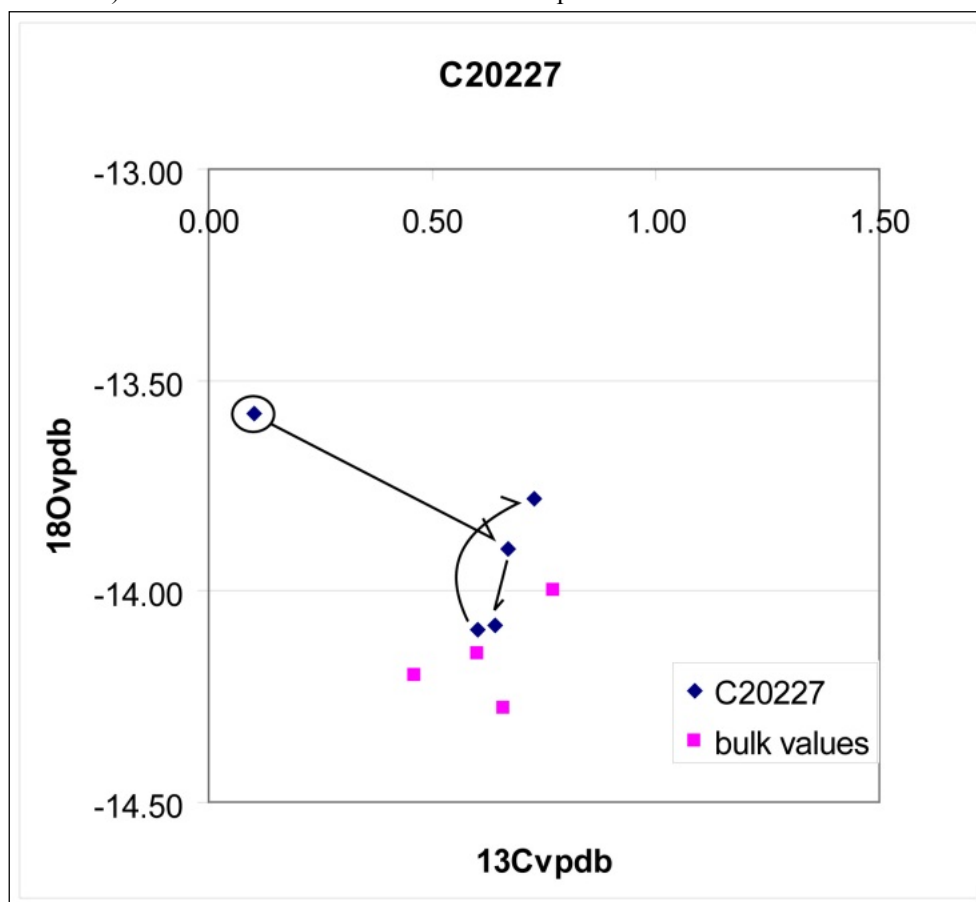

Table DR4. Selective Extraction of Standard Sample C20227

|            | $\delta^{13}\text{C} \text{ ‰ V-PDB}$ | $\delta^{18}\text{O} \text{ ‰ V-PDB}$ | time / minutes | Yield $\mu\text{mol/mg}$ |
|------------|---------------------------------------|---------------------------------------|----------------|--------------------------|
| C20227 I   | 0.10                                  | -13.58                                | 30             | 15.3                     |
| C20227 II  | 0.67                                  | -13.90                                | 125            | 42.2                     |
| C20227 III | 0.64                                  | -14.08                                | 240            | 38.4                     |
| C20227 IV  | 0.60                                  | -14.09                                | 350            | 29.1                     |
| C20227 V   | 0.73                                  | -13.78                                | 1495           | 363.8                    |

The first extraction shows a relatively light C and relatively heavy O composition. This could be due to small amounts of calcite or other rapidly dissolving minerals. The following extractions show a stable C ratio and slightly varying O ratios, with a small offset in  $\delta^{18}\text{O}$  (c. 0.5 ‰) between whole rock and selective extraction data that is small compared to the range found in the Fizzy and Orwell data.

### Test of selective extraction method 2 - Sample C20228

Figure DR2. Comparison of whole-rock and selective extraction of standard sample C20228 (note expanded scales). First extraction has circle around data point.

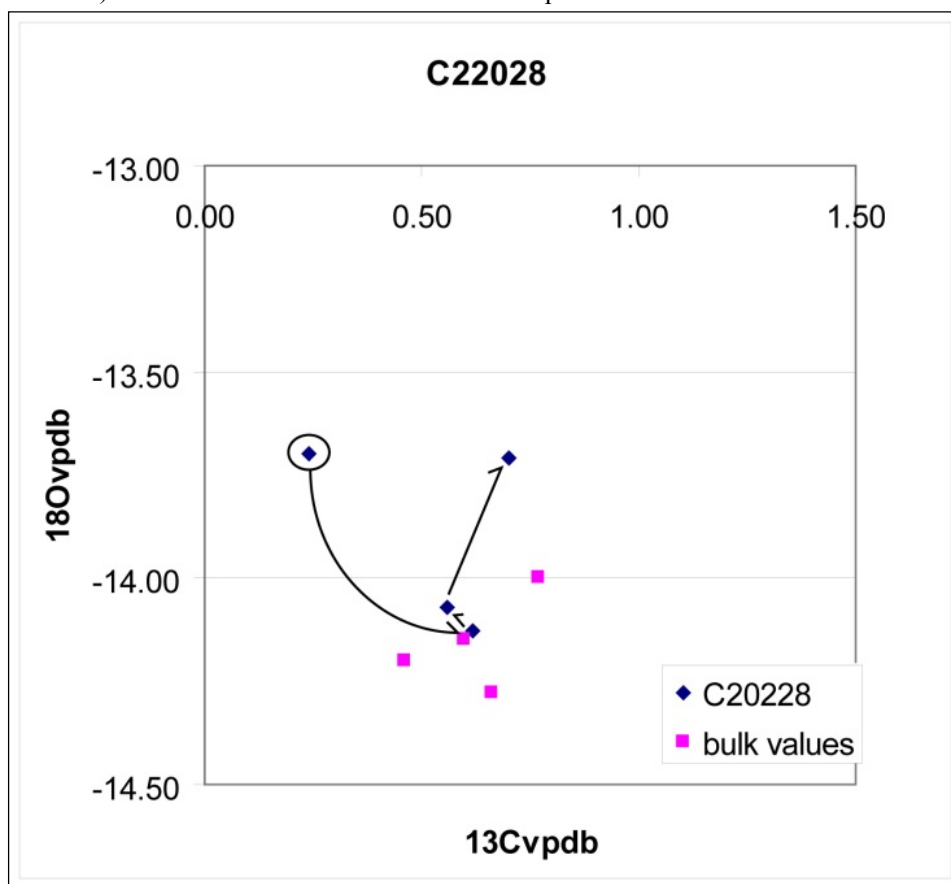

Table DR5. Selective Extraction of Standard Sample C20228

|            | $\delta^{13}\text{C} \text{ ‰ V-PDB}$ | $\delta^{18}\text{O} \text{ ‰ V-PDB}$ | time / minutes | Yield $\mu\text{mol/mg}$ |
|------------|---------------------------------------|---------------------------------------|----------------|--------------------------|
| C20228 I   | 0.24                                  | -13.70                                | 50             | 20.7                     |
| C20228 II  | -                                     | -                                     | 150            | 40.1                     |
| C20228 III | 0.62                                  | -14.13                                | 270            | 33.3                     |
| C20228 IV  | 0.56                                  | -14.07                                | 375            | 27.9                     |
| C20228 V   | 0.70                                  | -13.71                                | 1615           | 369                      |

Again, the first extraction shows a relatively light C and relatively heavy O composition. The second extraction failed. The following two extractions show a stable C and O within the range of the 'bulk values'. The sample was placed overnight at 100C and finally shows, like the experiment before, a trend towards a heavier O-ratio.

### Test of selective extraction method 3 - Sample C20229

Figure DR3. Comparison of whole-rock and selective extraction of standard sample C20229 (note expanded scales). First successful extraction has circle around data point.

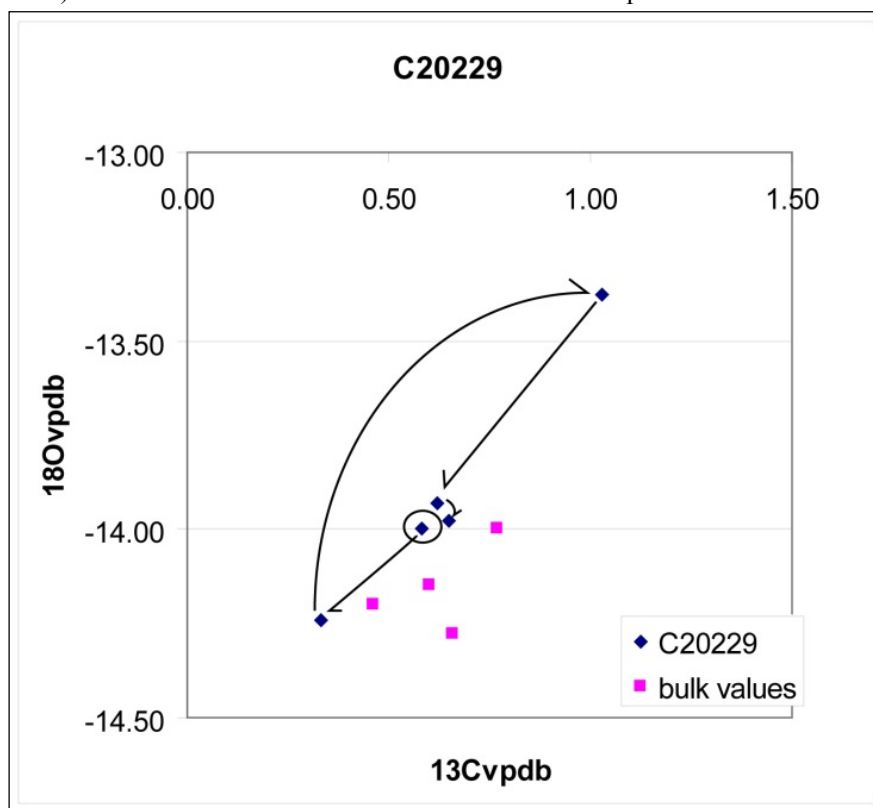

Table DR6. Selective Extraction of Standard Sample C20229

|            | $\delta^{13}\text{C} \text{ ‰ V-PDB}$ | $\delta^{18}\text{O} \text{ ‰ V-PDB}$ | time / minutes | Yield $\mu\text{mol/mg}$ |
|------------|---------------------------------------|---------------------------------------|----------------|--------------------------|
| C20229 I   | -                                     | -                                     | 30             | 15.1                     |
| C20229 II  | 0.58                                  | -14.00                                | 180            | 43.2                     |
| C20229 III | 0.33                                  | -14.24                                | 270            | 38                       |
| C20229 IV  | 1.03                                  | -13.38                                | 425            | 39.1                     |
| C20229 V   | -                                     | -                                     | 1450           | 130                      |
| C20229 VI  | 0.65                                  | -13.98                                | 1815           | 40                       |
| C20229 VII | 0.62                                  | -13.93                                | 2895           | not determined           |

The first extraction failed so that any anomalous mineral or artefact will not be recognized in this experiment. Extraction 4 is clearly anomalous, while the others are close to the whole-rock values. Even extraction 4 is shows significantly less deviation from the whole-rock values than is found in the data from Fizzy and Orwell.



#### Test of selective extraction method 4 - Sample C20230

Figure DR4. Comparison of whole-rock and selective extraction of standard sample C20230 (note expanded scales). First successful extraction has circle around data point.

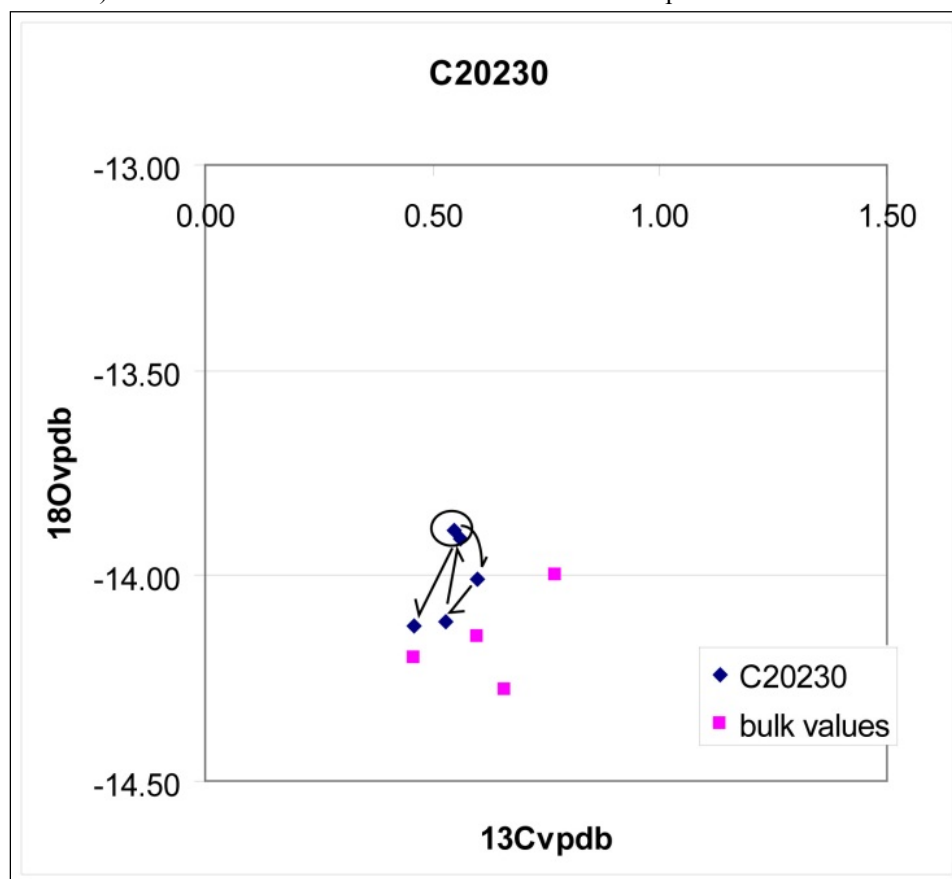

Table DR7. Selective Extraction of Standard Sample C20230

|            | $\delta^{13}\text{C} \text{ ‰ V-PDB}$ | $\delta^{18}\text{O} \text{ ‰ V-PDB}$ | time / minutes | Yield $\mu\text{mol/mg}$ |
|------------|---------------------------------------|---------------------------------------|----------------|--------------------------|
| C20230 I   | -                                     | -                                     | 30             | 4                        |
| C20230 II  | 0.55                                  | -13.89                                | 145            | 49.1                     |
| C20230 III | 0.60                                  | -14.01                                | 265            | 43.7                     |
| C20230 IV  | 0.53                                  | -14.11                                | 420            | 40.7                     |
| C20230 V   | -                                     | -                                     | 1430           | 134                      |
| C20230 VI  | 0.56                                  | -13.91                                | 1790           | 34.1                     |
| C20230 VII | 0.46                                  | -14.12                                | 2880           | not determined           |

The first extraction failed. The remaining selective extraction analyses are very close to the whole-rock values.

### Test of selective extraction method 5 - Sample C20231

Figure DR5. Comparison of whole-rock and selective extraction of standard sample C20231 (note expanded scales). First successful extraction has circle around data point.

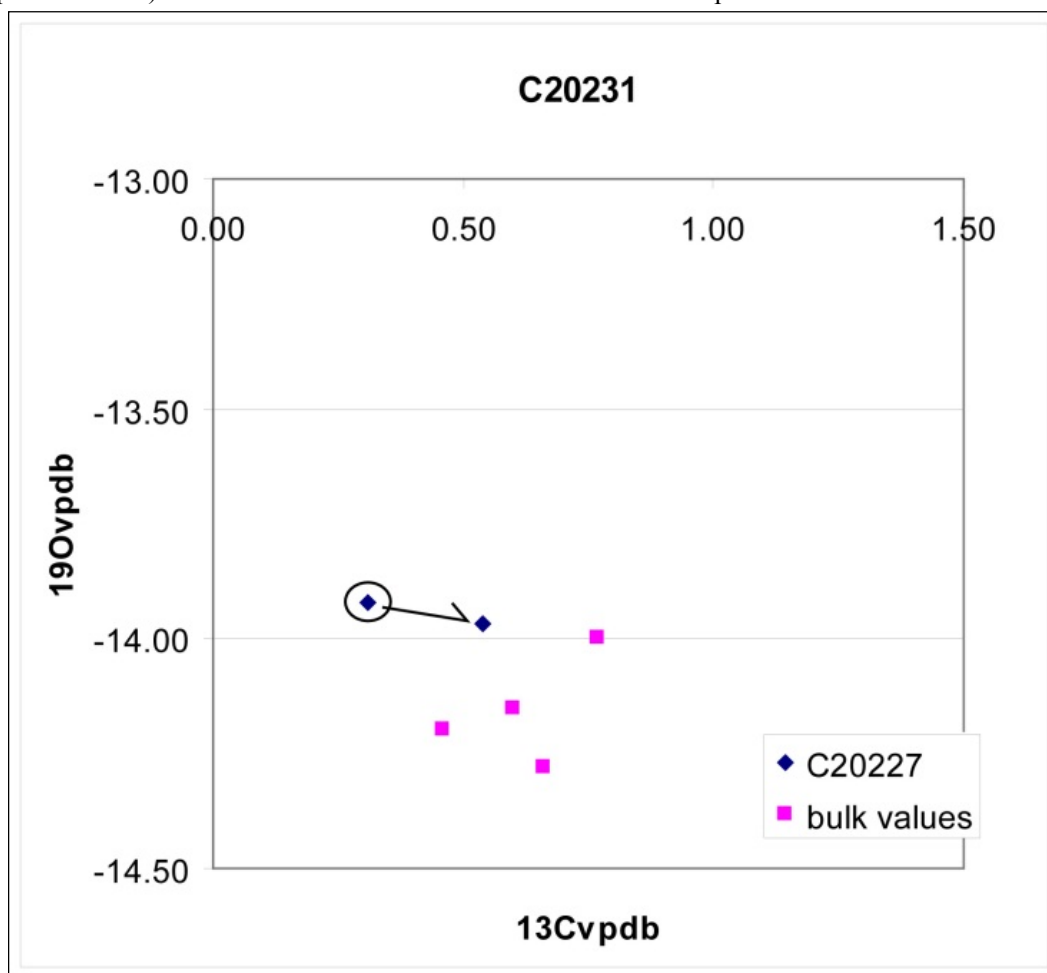

Table DR8. Selective Extraction of Standard Sample C20231

|            | $\delta^{13}\text{C} \text{ ‰ V-PDB}$ | $\delta^{18}\text{O} \text{ ‰ V-PDB}$ | time / minutes | Yield<br>$\mu\text{mol/mg}$ |
|------------|---------------------------------------|---------------------------------------|----------------|-----------------------------|
| C20231 I   | -                                     | -                                     | 30             | 3.4                         |
| C20231 II  | 0.31                                  | -13.92                                | 155            | 27.5                        |
| C20231 III | 0.54                                  | -13.97                                | 260            | 43.1                        |
| C20231 IV  | -                                     | -                                     | 400            | 44.5                        |
| C20231 V   | -                                     | -                                     | 1455           | 145                         |

Most of the extractions failed. The second extraction shows a slightly lighter O ratio than measurements of the third extraction, but given the low yields experienced in this experiment the results should perhaps be discounted.

### Test of selective extraction method 6 - Sample C20232

Figure DR6. Comparison of whole-rock and selective extraction of standard sample C20232. First extraction has circle around data point.

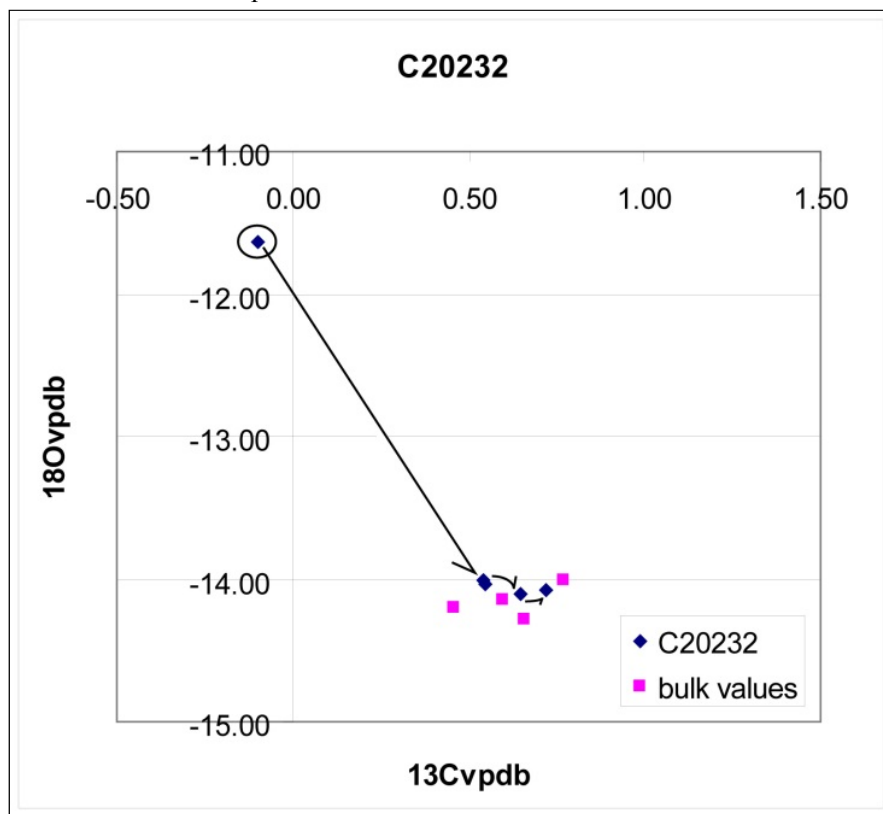

**Table DR9. Selective Extraction of Standard Sample C20232**

|            | $\delta^{13}\text{C} \text{ ‰ V-PDB}$ | $\delta^{18}\text{O} \text{ ‰ V-PDB}$ | time / minutes | Yield $\mu\text{mol/mg}$ |
|------------|---------------------------------------|---------------------------------------|----------------|--------------------------|
| C20232 I   | -0.10                                 | -11.64                                | 40             | 25.3                     |
| C20232 II  | 0.54                                  | -14.01                                | 170            | 54.1                     |
| C20232 III | 0.55                                  | -14.03                                | 285            | 35.8                     |
| C20232 IV  | 0.65                                  | -14.11                                | 405            | 30.3                     |
| C20232 V   | 0.72                                  | -14.08                                | 1485           | not determined           |

The first extraction shows a light C and heavy O composition. It could be due to rock heterogeneity, i.e. calcite dissolution which would perhaps be unusually abundant in this sample. Note that the heavy initial oxygen value is not seen in the analysis of the Fizzy and Orwell data. The remaining extractions show stable C and O ratios within the range of the 'bulk values'.

### Test of selective extraction method 7 - Sample C20233

Figure DR7. Comparison of whole-rock and selective extraction of standard sample C20233. First extraction has circle around data point.

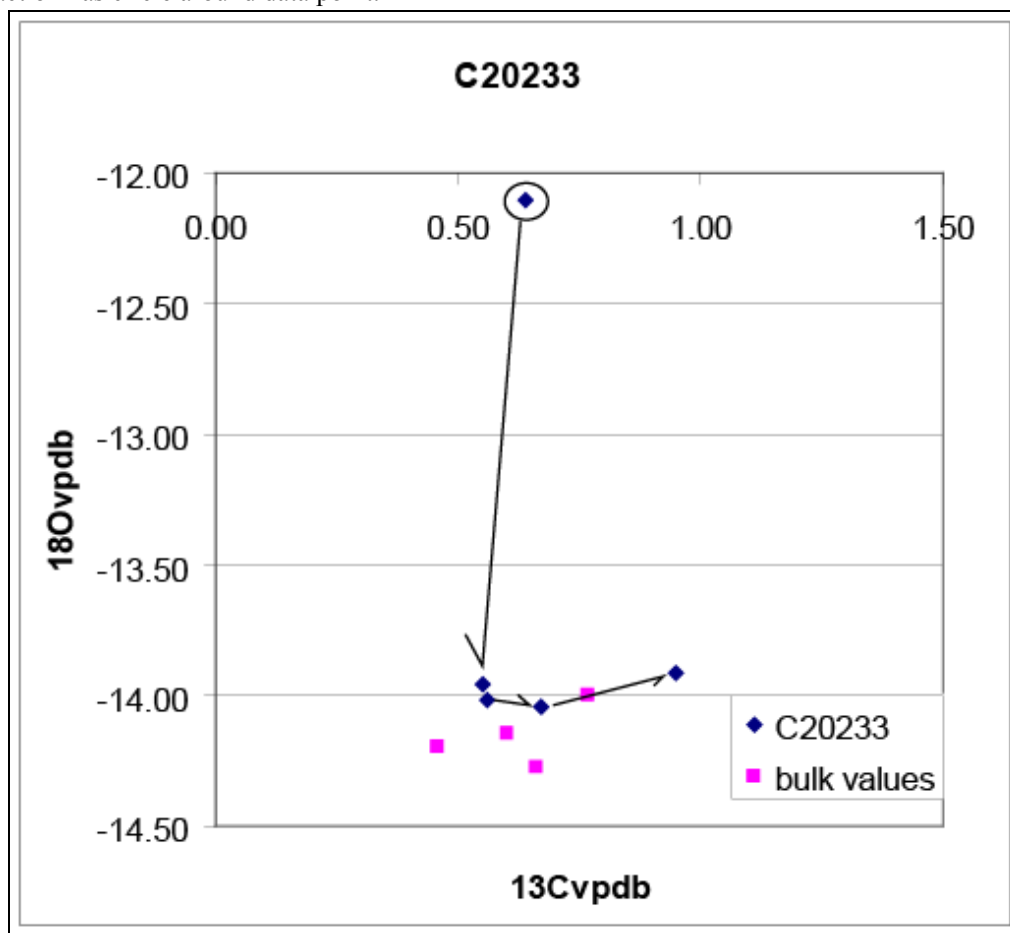

Table DR10. Selective Extraction of Standard Sample C20233

|            | $\delta^{13}\text{C}$ ‰ V-PDB | $\delta^{18}\text{O}$ ‰ V-PDB | time / minutes | Yield $\mu\text{mol/mg}$ |
|------------|-------------------------------|-------------------------------|----------------|--------------------------|
| C20233 I   | 0.64                          | -12.10                        | 30             | 12.6                     |
| C20233 II  | 0.55                          | -13.96                        | 160            | 45.1                     |
| C20233 III | 0.56                          | -14.02                        | 275            | 40.3                     |
| C20233 IV  | 0.67                          | -14.04                        | 385            | 32.3                     |
| C20233 V   | 0.95                          | -13.91                        | 1455           | not determined           |

The first extraction shows a very heavy O composition. The following extractions show stable O ratio and a slightly varying C ratio which becomes slightly heavier with increasing time.

## **Test of Selective Extraction Method: Discussion and Conclusions**

The selective extraction analyses generally lie within the range of whole-rock analyses. Only a minority lie more than 0.5 ‰ away from the whole-rock data, and these are the initial selective extraction analyses which might be due to a reactive contaminant mineral (calcite?) within the dolomite standard present in concentrations too low for detection by XRD.

In contrast to the selective extraction analyses of the Orwell and Fizzy samples, the selective extraction test analyses lack anomalously light  $\delta^{13}\text{C}$  and  $\delta^{18}\text{O}$  values. It could hence be concluded that the anomalously light  $\delta^{13}\text{C}$  and  $\delta^{18}\text{O}$  values from Orwell and Fizzy are not artefacts of the selective extraction technique, but reflect genuine compositional variation within the sample material.
